# Supplementary material for: Using CRISPR Interference as a Therapeutic Approach to Treat TGFβ2-Induced Ocular Hypertension and Glaucoma
Source: PubMed Central journal article supplement (PMC8434756; doi:10.1167/iovs.62.12.7), 2021-09-09
Supplement: iovs-62-12-7_s001.pdf [file iovs-62-12-7_s001.pdf]

|                 |          | Naive | NT<br>sgRNA | TGFβ2<br>sgRNA<br>15 | TGFβ2<br>sgRNA<br>23 | TGFβ2<br>sgRNA<br>42 | TGFβ2<br>sgRNA<br>43 |
|-----------------|----------|-------|-------------|----------------------|----------------------|----------------------|----------------------|
| Active<br>TGFβ2 | Sample 1 | 1.00  | 0.92        | 0.85                 | 0.73                 | 0.42                 | 0.30                 |
|                 | Sample 2 | 1.00  | 0.96        | 1.27                 | 1.30                 | 0.85                 | 0.61                 |
|                 | Sample 3 | 1.00  | 0.70        | 0.31                 | 0.53                 | 0.42                 | 0.76                 |
| Total<br>TGFβ2  | Sample 1 | 1.00  | 1.12        | 0.80                 | 1.54                 | 0.76                 | 0.92                 |
|                 | Sample 2 | 1.00  | 0.81        | 1.51                 | 1.01                 | 0.70                 | 0.79                 |
|                 | Sample 3 | 1.00  | 1.94        | 1.80                 | 1.13                 | 0.64                 | 0.61                 |

Supplemental Table 1. Densitometry of the level of TGFβ2 in GTM3 cells.

GTM3 cells were transduced with the described vectors, and the proteins were used for WB. The active and total TGFβ2 protein bands in whole cell lysate blots were used for densitometry with normalization to GAPDH. Naïve controls were set at “1.00”. N=3.
